# Supplementary material for: Effect of number and different types of proton donors on excited-state intramolecular single and double proton transfer in bipyridine derivatives: theoretical insights
Source: Royal Society of Chemistry journal article supplement (doi:10.1039/d0nj01304h), 2020-01-01
Supplement: d0nj01304h1.pdf [file d0nj01304h1.pdf]

## Supplementary Information

### **Effect of Number and Different types of Proton Donors on Excited-State Intramolecular Single and Double Proton Transfers of Bipyridine Derivatives: Theoretical Insights**

Komsun Chaihan<sup>a,b</sup>, Nawee Kungwan<sup>a,c,\*</sup>

<sup>a</sup> Department of Chemistry, Faculty of Science, Chiang Mai University, Chiang Mai 50200, Thailand

<sup>b</sup> The Graduate School, Chiang Mai University, Chiang Mai 50200, Thailand

<sup>c</sup> Center of Excellence in Materials Science and Technology, Chiang Mai University, Chiang Mai 50200, Thailand

*\*Corresponding author e-mail: naweekung@gmail.com*

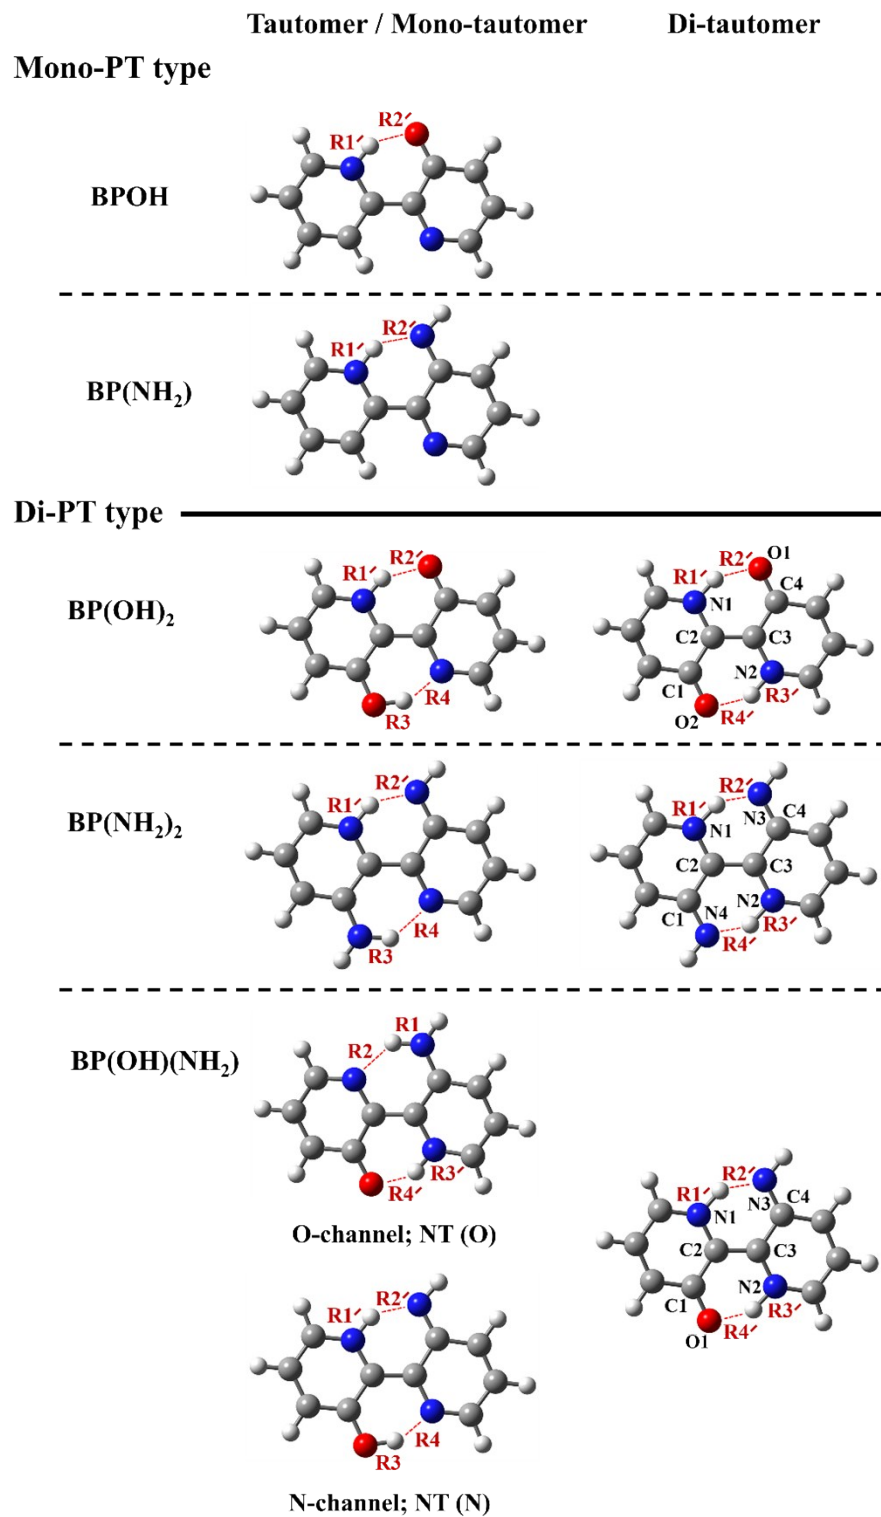

**Figure S1.** Optimized structures of tautomer (T), mono-tautomer (NT), and di-tautomer (TT) forms computed at B3LYP/TZVP level of theory in gas phase.

**Table S1.** Covalent bonds, intra-HBs, distances between heavy atoms and torsion angles of tautomer (T), mono-tautomer (NT), and di-tautomer (TT) forms for all molecules computed at B3LYP/TZVP (in  $S_0$ ) and TD-B3LYP/TZVP (in  $S_1$ ) levels of theory.

| Molecule                              | Form   | R1/R1□      |        | R2/R2□ |       | R3/R3□ |       | R4/R4□ |       | O···N<br>or N···N |        | N1C2C3C4<br>/N2C3C2C1 |        |     |      |
|---------------------------------------|--------|-------------|--------|--------|-------|--------|-------|--------|-------|-------------------|--------|-----------------------|--------|-----|------|
|                                       |        | $S_0$       | $S_1$  | $S_0$  | $S_1$ | $S_0$  | $S_1$ | $S_0$  | $S_1$ | $S_0$             | $S_1$  | $S_0$                 | $S_1$  |     |      |
| <i>Mono-PT type</i>                   |        |             |        |        |       |        |       |        |       |                   |        |                       |        |     |      |
| <b>BPOH</b>                           | K      | 1.032       | 1.027  | 1.797  | 1.792 | —      | —     | —      | —     | 2.534             | 2.677  | 0.0                   | 0.0    |     |      |
| <b>BP(NH<sub>2</sub>)</b>             | K      | 1.037       | 1.037  | 1.814  | 1.775 | —      | —     | —      | —     | 2.667             | 2.673  | 0.0                   | 0.0    |     |      |
| <i>Di-PT type</i>                     |        |             |        |        |       |        |       |        |       |                   |        |                       |        |     |      |
| <b>BP(OH)<sub>2</sub></b>             | MK     | 1.110       | 1.033  | 1.441  | 1.764 | 1.009  | 0.989 | 1.684  | 1.779 | 2.602             | 2.655  | 0.0                   | 12.0   |     |      |
|                                       | DK     | 1.063       | 1.038  | 1.607  | 1.722 | 1.063  | 1.038 | 1.607  | 1.722 | 2.552             | 2.610  | 0.0                   | 0.0    |     |      |
| <b>BP(NH<sub>2</sub>)<sub>2</sub></b> | MK     | 1.047       | 1.070  | 1.715  | 1.632 | 1.020  | 1.014 | 1.841  | 1.958 | 2.651             | 2.739  | 0.2                   | 15.0   |     |      |
|                                       | DK     | 1.113       | 1.052  | 1.504  | 1.685 | 1.113  | 1.052 | 1.504  | 1.684 | 2.511             | 2.598  | 0.0                   | 0.0    |     |      |
| <b>BP(OH)(NH<sub>2</sub>)</b>         | MK (O) | N···N/O···N |        |        |       |        |       |        |       |                   |        | 2.663/                | 2.768/ | 0.0 | 14.0 |
|                                       |        | 2.609       | 2.601  | 0.0    | 28.0  |        |       |        |       |                   |        |                       |        |     |      |
|                                       |        | 2.678/      | 2.616/ |        |       |        |       |        |       |                   |        |                       |        |     |      |
| MK (N)                                | 1.037  | 1.061       | 1.815  |        |       | 1.715  | 1.020 | 0.990  | 1.596 | 1.786             | 2.534  | 2.666                 | 0.0    | 0.0 |      |
|                                       | DK     | 1.092       | 1.038  | 1.566  | 1.777 | 1.072  | 1.047 | 1.561  | 1.631 | 2.539/            | 2.650/ |                       |        |     |      |
|                                       |        | 2.529       | 2.555  |        |       |        |       |        |       |                   |        |                       |        |     |      |

**Table S2.** Vibrational frequencies corresponding to O-H stretching and symmetric and asymmetric N-H stretching in  $S_0$  and  $S_1$  states of N form (mono-PT type) and NN form (di-PT type).

| Vibrational mode          | State | Wavenumber (cm <sup>-1</sup> ) |                      |                     |                                   |                          |
|---------------------------|-------|--------------------------------|----------------------|---------------------|-----------------------------------|--------------------------|
|                           |       | Mono-PT type                   |                      |                     | Di-PT type                        |                          |
|                           |       | BPOH                           | BP(NH <sub>2</sub> ) | BP(OH) <sub>2</sub> | BP(NH <sub>2</sub> ) <sub>2</sub> | BP(OH)(NH <sub>2</sub> ) |
| O-H stretching            | $S_0$ | 3134                           | —                    | 3071                | —                                 | 2984                     |
|                           | $S_1$ | 2419                           | —                    | 2338                | —                                 | 2523                     |
| $\Delta\nu$               |       | 715                            | —                    | 733                 | —                                 | 461                      |
| Symmetric N-H stretching  | $S_0$ | —                              | 3458                 | —                   | 3435                              | 3434                     |
|                           | $S_1$ | —                              | 2850                 | —                   | 3104                              | 3066                     |
| $\Delta\nu$               |       | —                              | 608                  | —                   | 331                               | 368                      |
| Asymmetric N-H stretching | $S_0$ | —                              | 3674                 | —                   | 3678                              | 3681                     |
|                           | $S_1$ | —                              | 3602                 | —                   | 3629                              | 3633                     |
| $\Delta\nu$               |       | —                              | 72                   | —                   | 49                                | 48                       |

\*positive (+) value of  $\Delta\nu$  corresponded to red-shift.

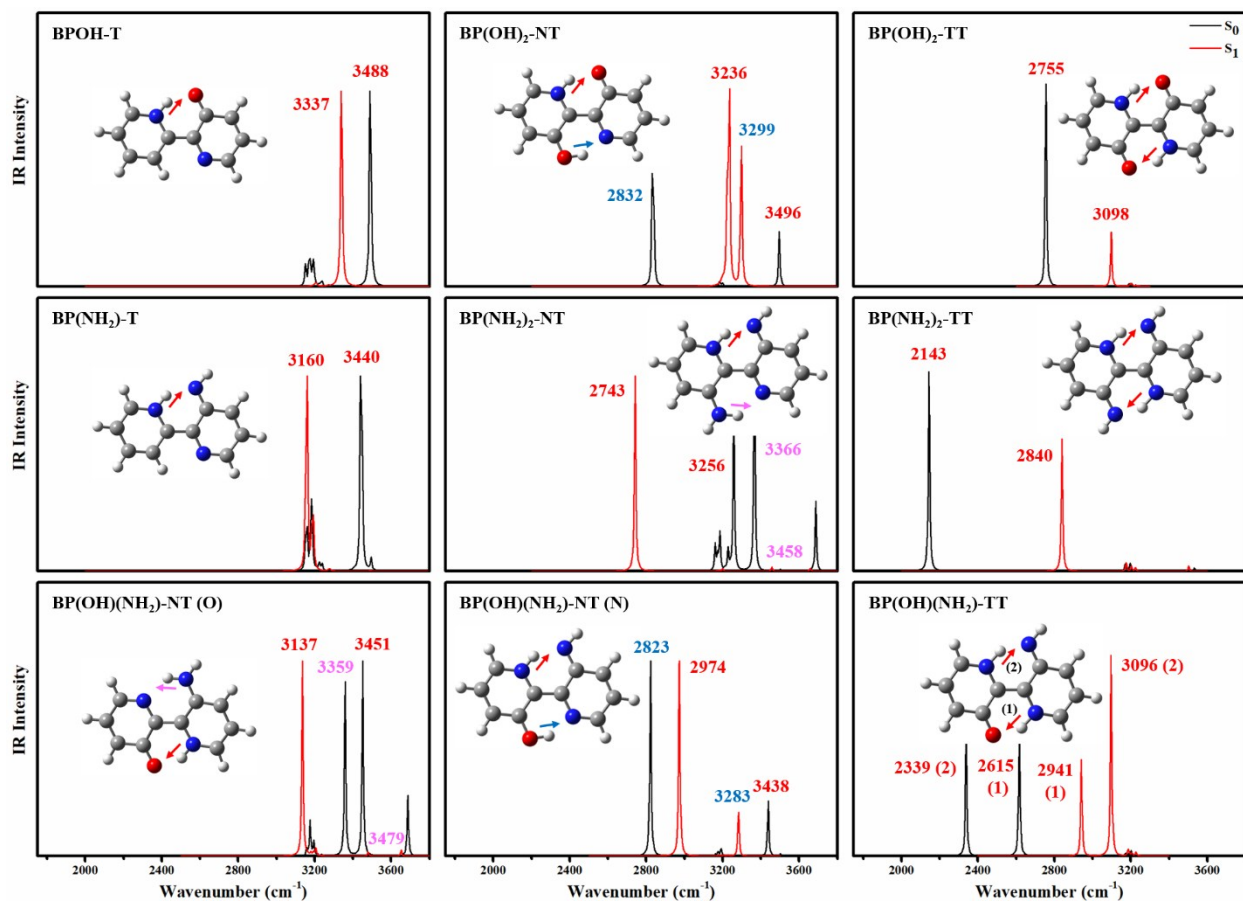

**Figure S2.** Calculated vibrational spectra of O-H and N-H stretching in the  $S_0$  (black line) and  $S_1$  (red line) states of tautomer (T), mono-tautomer (NT) and di-tautomer (TT) forms. The O-H stretching is labeled in blue. The N-H stretching for primary amine and secondary amine are labeled in pink and red, respectively.

**Table S3.** Vibrational frequencies corresponding to O-H stretching and N-H stretching corresponding to 2<sup>nd</sup> PT process in  $S_0$  and  $S_1$  states of mono-tautomer (NT) form of di-PT type.

| Vibrational mode | State | Wavenumber (cm <sup>-1</sup> ) |                                   |                          |        |
|------------------|-------|--------------------------------|-----------------------------------|--------------------------|--------|
|                  |       | BP(OH) <sub>2</sub>            | BP(NH <sub>2</sub> ) <sub>2</sub> | BP(OH)(NH <sub>2</sub> ) |        |
|                  |       |                                |                                   | NT (O)                   | NT (N) |
| O-H stretching   | $S_0$ | 2832                           | —                                 | —                        | 2823   |
|                  | $S_1$ | 3299                           | —                                 | —                        | 3283   |
| $\Delta\nu$      |       | -467                           | —                                 | —                        | -460   |
| N-H stretching   | $S_0$ | —                              | 3366                              | 3359                     | —      |
|                  | $S_1$ | —                              | 3458                              | 3479                     | —      |
| $\Delta\nu$      |       | —                              | -92                               | -120                     | —      |

\*negative (-) value of  $\Delta\nu$  corresponded to blue-shift.

**Table S4.** Bond critical point parameters (in a.u.) in  $S_1$  state corresponding to the intra-HBs of N and NN forms for all molecules.

| Molecule                              | Bonds                  | $\rho(\mathbf{r})$ | $\mathbf{G}(\mathbf{r})$ | $\mathbf{V}(\mathbf{r})$ | $\mathbf{H}(\mathbf{r})$ | $\nabla^2\rho(\mathbf{r})$ | $E_{\text{HB}}$ |
|---------------------------------------|------------------------|--------------------|--------------------------|--------------------------|--------------------------|----------------------------|-----------------|
| <i>Mono-PT type</i>                   |                        |                    |                          |                          |                          |                            |                 |
| <b>BPOH</b>                           | R2                     | 0.065              | 0.048                    | -0.066                   | -0.018                   | 0.118                      | 0.033           |
| <b>BP(NH<sub>2</sub>)</b>             | R2                     | 0.054              | 0.042                    | -0.052                   | -0.011                   | 0.124                      | 0.026           |
| <i>Di-PT type</i>                     |                        |                    |                          |                          |                          |                            |                 |
| <b>BP(OH<sub>2</sub>)</b>             | R2, R4                 | 0.058              | 0.042                    | -0.056                   | -0.014                   | 0.109                      | 0.028           |
| <b>BP(NH<sub>2</sub>)<sub>2</sub></b> | R2, R4                 | 0.047              | 0.037                    | -0.044                   | -0.007                   | 0.121                      | 0.022           |
| <b>BP(OH)(NH<sub>2</sub>)</b>         | R2<br>(N-H $\cdots$ N) | 0.047              | 0.036                    | -0.043                   | -0.007                   | 0.118                      | 0.022           |
|                                       | R4<br>(O-H $\cdots$ N) | 0.075              | 0.052                    | -0.078                   | -0.026                   | 0.107                      | 0.039           |

**Table S5.** Bond critical point parameters (in a.u.) in  $S_1$  state corresponding to the 2<sup>nd</sup> PT process of NT form of di-PT type.

| Molecule                              | Form   | Bonds                  | $\rho(\mathbf{r})$ | $\mathbf{G}(\mathbf{r})$ | $\mathbf{V}(\mathbf{r})$ | $\mathbf{H}(\mathbf{r})$ | $\nabla^2\rho(\mathbf{r})$ | $E_{\text{HB}}$ |
|---------------------------------------|--------|------------------------|--------------------|--------------------------|--------------------------|--------------------------|----------------------------|-----------------|
| <b>BP(OH<sub>2</sub>)</b>             | MK     | R4                     | 0.047              | 0.033                    | -0.042                   | -0.009                   | 0.098                      | 0.021           |
| <b>BP(NH<sub>2</sub>)<sub>2</sub></b> | MK     | R4                     | 0.032              | 0.025                    | -0.026                   | -0.001                   | 0.096                      | 0.013           |
| <b>BP(OH)(NH<sub>2</sub>)</b>         | MK (N) | R4<br>(O-H $\cdots$ N) | 0.046              | 0.033                    | -0.041                   | -0.008                   | 0.097                      | 0.021           |
|                                       | MK (O) | R2<br>(N-H $\cdots$ N) | 0.030              | 0.023                    | -0.023                   | -0.0003                  | 0.091                      | 0.012           |

**Table S6.** Calculated maxima wavelengths of absorption ( $\lambda_{\text{abs}}$ ) and emission ( $\lambda_{\text{emis}}$ ) spectra with their oscillator strengths ( $f$ ) and molecular orbitals (MOs) contribution as well as Stokes shifts of all molecules computed at TD-B3LYP/TZVP level of theory.

| Molecule                                    | Form   | Absorption                 |       |                  | Emission                    |       | Stokes shift (nm) |
|---------------------------------------------|--------|----------------------------|-------|------------------|-----------------------------|-------|-------------------|
|                                             |        | $\lambda_{\text{abs, nm}}$ | $f$   | MOs contribution | $\lambda_{\text{emis, nm}}$ | $f$   |                   |
| <i>Mono-PT type</i>                         |        |                            |       |                  |                             |       |                   |
| <b>BPOH</b>                                 | N      | 313                        | 0.315 | HOMO→LUMO (96%)  | 336                         | 0.300 | 23                |
|                                             | T      |                            |       |                  | 692                         | 0.024 | 379               |
| <b>BP(NH<sub>2</sub>)</b>                   | N      | 340                        | 0.263 | HOMO→LUMO (97%)  | 384                         | 0.230 | 44                |
|                                             | T      |                            |       |                  | 743                         | 0.017 | 403               |
| <hr style="border-top: 1px dashed black;"/> |        |                            |       |                  |                             |       |                   |
| <i>Di-PT type</i>                           |        |                            |       |                  |                             |       |                   |
| <b>BP(OH)<sub>2</sub></b>                   | NN     | 329                        | 0.370 | HOMO→LUMO (97%)  | 361                         | 0.398 | 32                |
|                                             | NT     |                            |       |                  | 530                         | 1.37  | 201               |
|                                             | TT     |                            |       |                  | 460                         | 0.400 | 131               |
| <b>BP(NH<sub>2</sub>)<sub>2</sub></b>       | NN     | 362                        | 0.334 | HOMO→LUMO (98%)  | 403                         | 0.321 | 41                |
|                                             | NT     |                            |       |                  | 623                         | 0.111 | 261               |
|                                             | TT     |                            |       |                  | 532                         | 0.308 | 170               |
| <b>BP(OH)(NH<sub>2</sub>)</b>               | NN     | 350                        | 0.331 | HOMO→LUMO (98%)  | 383                         | 0.342 | 33                |
|                                             | NT (O) |                            |       |                  | 539                         | 0.139 | 189               |
|                                             | NT (N) |                            |       |                  | 727                         | 0.065 | 377               |
|                                             | TT     |                            |       |                  | 547                         | 0.223 | 197               |

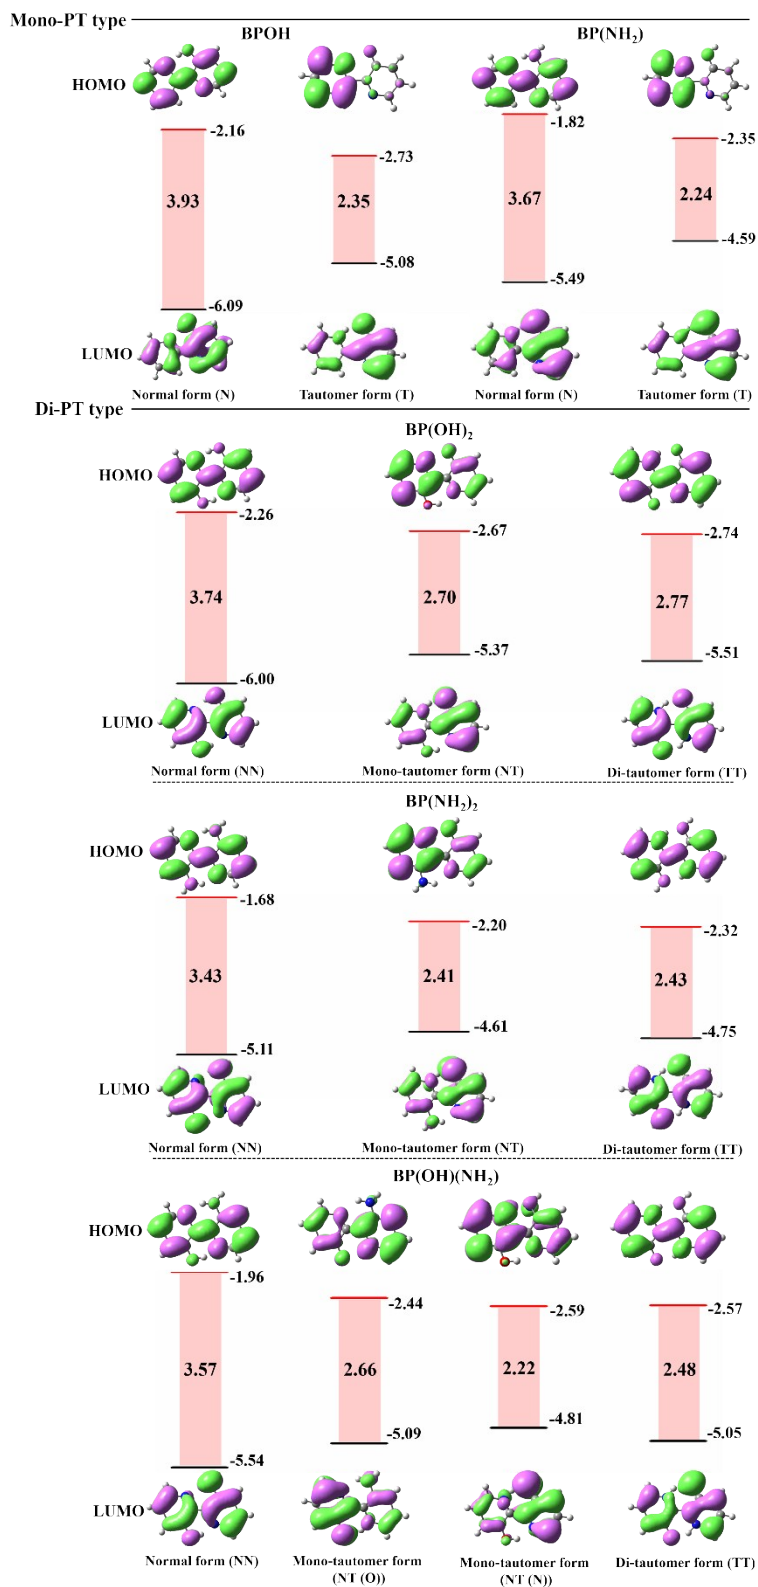

**Figure S3.** Schematic diagram of HOMO and LUMO energy levels as well as energy gaps (eV) corresponding to emission peaks of all molecules computed at B3LYP/TZVP level of theory.

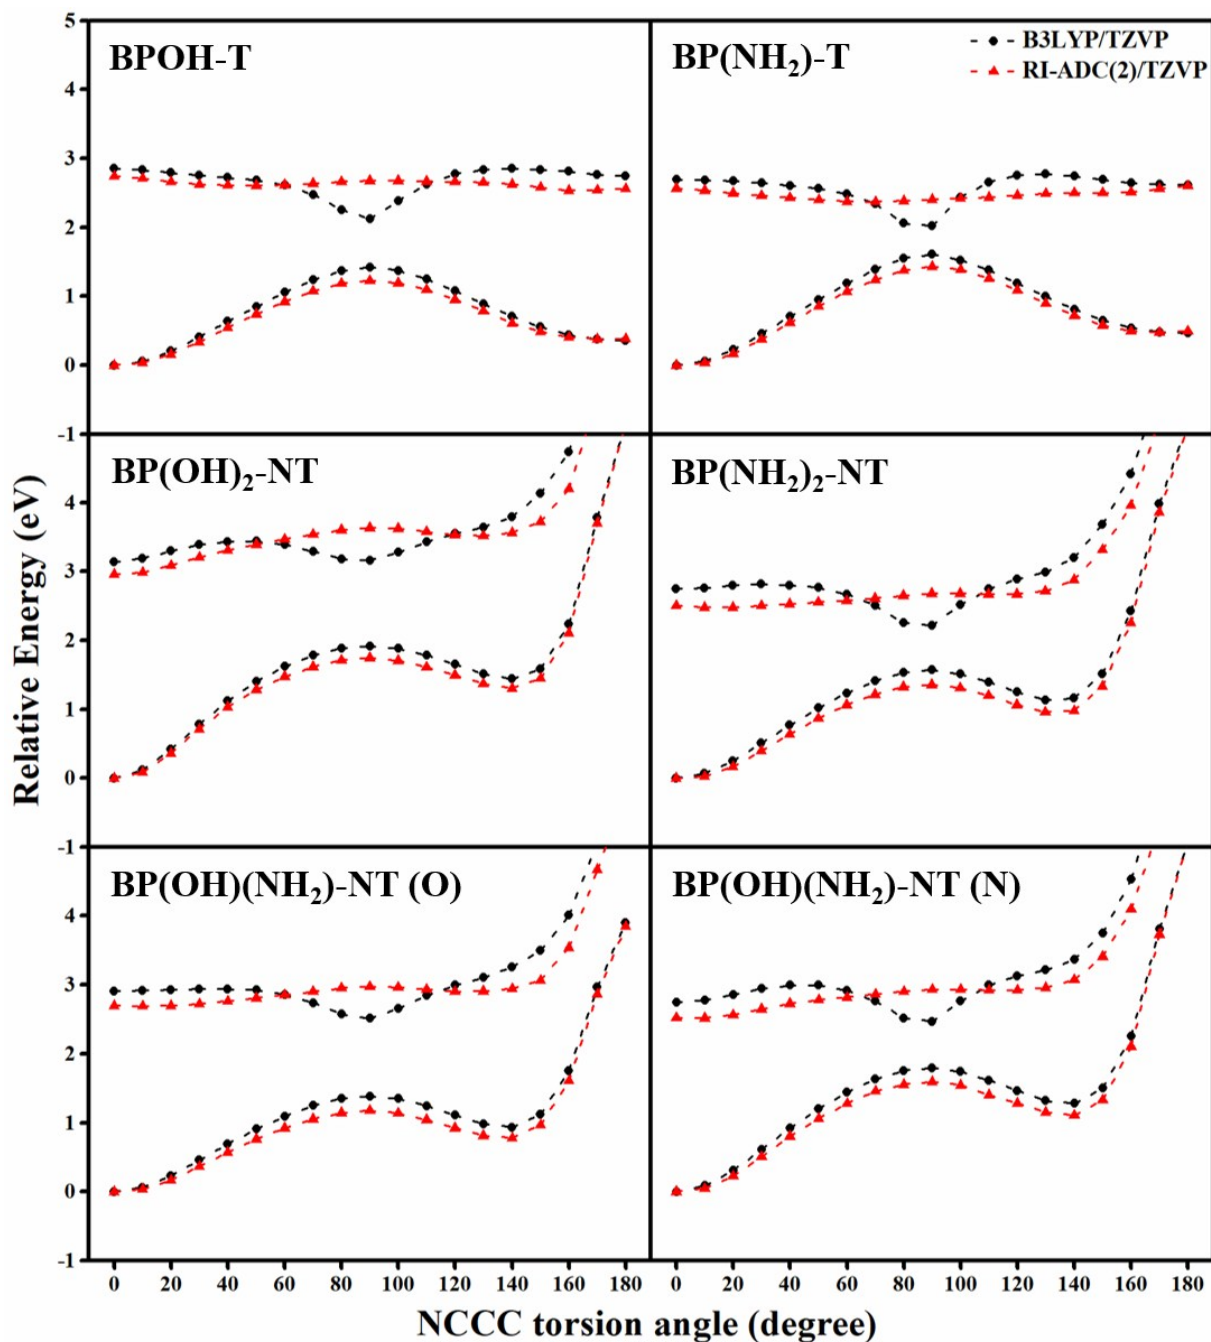

**Figure S4.** Potential energy curves corresponding to scanned NCCC torsion of tautomer (T) and mono-tautomer (NT) species of all molecules calculated at TD-B3LYP (black lines) and RI-ADC(2) (red lines) with TZVP basis set.
